# Supplementary material for: Virtual navigation tested on a mobile app is predictive of real-world wayfinding navigation performance
Source: PubMed Central journal article supplement (PMC6422266; doi:10.1371/journal.pone.0213272), 2019-03-18
Supplement: pone.0213272.s001.pdf [file pone.0213272.s001.pdf]

## Memorise the map

Memorise the map and find the checkpoint

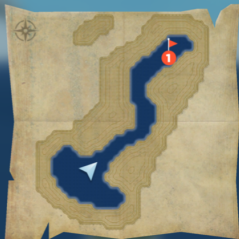

CLOSE

## Memorise the map

Memorise the map and find the checkpoint

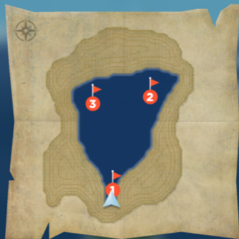

CLOSE

## Memorise the map

Memorise the map and find the checkpoint

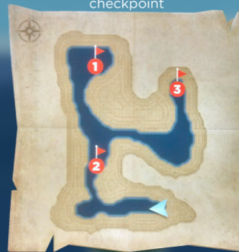

CLOSE

## Memorise the map

Memorise the map and find the checkpoint

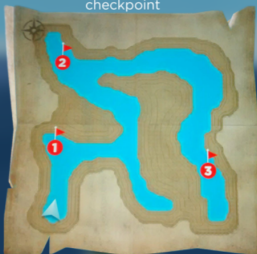

CLOSE

## Memorise the map

Memorise the map and find the checkpoint

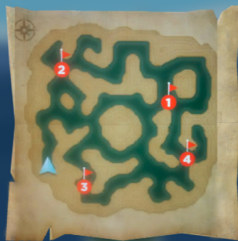

CLOSE
