# Supplementary material for: Virtual navigation tested on a mobile app is predictive of real-world wayfinding navigation performance
Source: PubMed Central journal article supplement (PMC6422266; doi:10.1371/journal.pone.0213272), 2019-03-18

A

Level 14: one turn

Level 34: two turns

Level 54: three turns

Level 44: four turns

Level 74: five turns

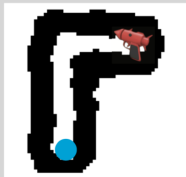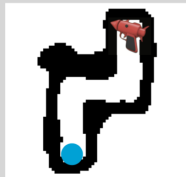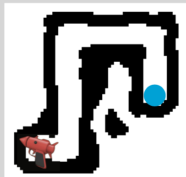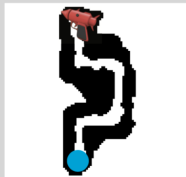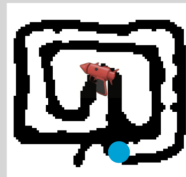

● starting point

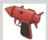

flare

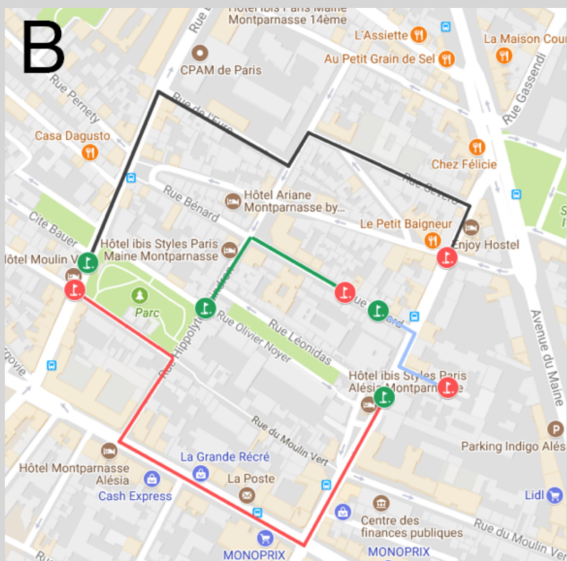

Supplement: pone.0213272.s004.pdf [file pone.0213272.s004.pdf]
