# Supplementary material for: Virtual navigation tested on a mobile app is predictive of real-world wayfinding navigation performance
Source: PubMed Central journal article supplement (PMC6422266; doi:10.1371/journal.pone.0213272), 2019-03-18
Supplement: pone.0213272.s005.pdf [file pone.0213272.s005.pdf]

Path Integration Performance (scaled)

2  
1.5  
1  
0.5  
0  
-0.5  
-1  
-1.5  
-2  
-2.5

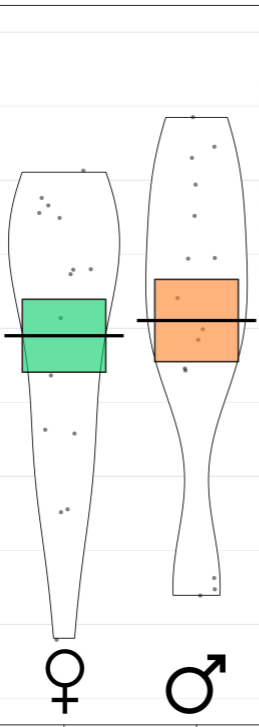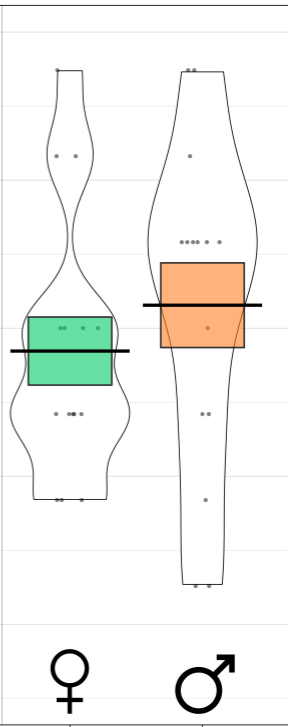

Real World

Video Game
